# Supplementary material for: Molecular Diagnostics in Clinical Oncology
Source: PubMed Central journal article supplement (PMC6119963; doi:10.3389/fmolb.2018.00076), 2018-08-27
Supplement: Data_Sheet_1.pdf [file Data_Sheet_1.pdf]

## *Supplementary material*

### **Molecular diagnostics in clinical oncology**

Anna P. Sokolenko\*, Evgeny N. Imyanitov\*

**\*Correspondence:** Anna P. Sokolenko, annasokolenko@mail.ru; Evgeny N. Imyanitov, evgeny@imyanitov.spb.ru

#### *Literature search criteria*

**Search for recent reviews on predictive markers (papers devoted to specific cancer type are excluded)**

review [ptyp] AND (cancer [title] OR carcinoma [title] OR tumor [title] OR tumors [title] OR tumour [title] OR tumours [title] OR malignancy [title] OR malignancies [title] OR neoplasm [title] OR neoplasms [title]) AND (predict\* OR efficacy OR success OR response OR effect OR customized OR individualized OR survival) AND (therapy OR treatment) AND (2017 [pdat] OR 2018 [pdat]) AND english [lang] AND (expression OR molecular OR gene OR polymorphism OR allele OR SNP OR genetic OR profile OR profiling OR array OR microarray OR marker OR mutation OR rearrangement) NOT (breast [title] OR gastr\* [title] OR stoma\* [title] OR colo\* [title] OR pancrea\* [title] OR lymph\* [title] OR prostat\* [title] OR bladder [title] OR melanoma [title] OR head [title] OR sarcom\* [title] OR neuro\* [title] OR esophageal [title] OR esophagus [title] OR ovar\* [title] OR lung [title] OR renal [title] OR kidney [title] OR cholangio\* [title] OR biliary [title] OR brain [title] OR glio\* [title] OR leuke\* [title] OR myeloma [title] OR liver [title] OR hepa\* [title] OR urolo\* [title])

**Search for recent reviews on hereditary cancers (papers devoted to specific cancer type are excluded)**

review [ptyp] AND (cancer [title] OR carcinoma [title] OR tumor [title] OR tumors [title] OR tumour [title] OR tumours [title] OR malignancy [title] OR malignancies [title] OR neoplasm [title] OR neoplasms [title]) AND (heredit\* [title] OR famil\* [title] OR predispos\* [title]) AND (2016 [pdat] OR 2017 [pdat] OR 2018 [pdat]) AND english [lang] AND (expression OR molecular OR gene OR polymorphism OR allele OR SNP OR genetic OR profile OR profiling OR array OR microarray OR marker OR mutation OR rearrangement) NOT (breast [title] OR gastr\* [title] OR stoma\* [title] OR colo\* [title] OR pancrea\* [title] OR lymph\* [title] OR prostat\* [title] OR bladder [title] OR melanoma [title] OR head [title] OR sarcom\* [title] OR neuro\* [title] OR esophageal [title] OR esophagus [title] OR ovar\* [title] OR lung [title] OR renal [title] OR kidney [title] OR cholangio\* [title] OR biliary [title] OR brain [title] OR glio\* [title] OR leuke\* [title] OR myeloma [title] OR liver [title] OR hepa\* [title] OR urolo\* [title])

**Search for recent reviews on liquid biopsy (papers devoted to specific cancer type are excluded)**

review [ptyp] AND (cancer [title] OR carcinoma [title] OR tumor [title] OR tumors [title] OR tumour [title] OR tumours [title] OR malignancy [title] OR malignancies [title] OR neoplasm [title] OR neoplasms [title]) AND (“liquid biops\*” [title] OR “circulating DNA” OR “circulating microRNA\*” OR “circulating nucleic”) AND (2017 [pdat] OR 2018 [pdat]) AND english [lang] NOT (breast [title] OR gastr\* [title] OR stoma\* [title] OR colo\* [title] OR pancrea\* [title] OR lymph\* [title] OR prostat\* [title] OR bladder [title] OR melanoma [title] OR head [title] OR sarcom\* [title] OR neuro\* [title] OR esophageal [title] OR esophagus [title] OR ovar\* [title] OR lung [title] OR renal [title] OR kidney [title] OR cholangio\* [title] OR biliary [title] OR brain [title] OR glio\* [title] OR leuke\* [title] OR myeloma [title] OR liver [title] OR hepa\* [title] OR urolo\* [title] OR endometr\* OR thyroid\*)

### **Search for papers on cancers of unknown primary site**

((cancer AND CUP) OR (adenocarcinoma AND CUP) OR “cancer of unknown primary”) AND (PCR OR RNA OR clinical trial [ptyp] OR mutation OR review [ptyp]) AND English [lang]

### **Search for recent studies on molecular diagnostics (only top journal are considered; reviews are excluded)**

(cancer [title] OR carcinoma [title] OR tumor [title] OR tumors [title] OR tumour [title] OR tumours [title] OR malignancy [title] OR malignancies [title] OR neoplasm [title] OR neoplasms [title]) AND (predict\* OR efficacy OR success OR response OR effect OR customized OR individualized OR survival) AND (therapy OR treatment) AND (2016 [pdat] OR 2017 [pdat] OR 2018 [pdat]) AND english [lang] AND (expression OR molecular OR gene OR polymorphism OR allele OR SNP OR genetic OR profile OR profiling OR array OR microarray OR marker OR mutation OR sequencing OR heredit\* [title] OR familial [title] OR predispos\* [title] OR “liquid biops\*” [title] OR “circulating DNA” OR “circulating microRNA” OR “circulating nucleic” OR “plasma DNA” OR “plasma microRNA”) AND (Cancer Res [jour] OR Clin Cancer Res [jour] OR Science [jour] OR Nature [jour] OR Nat Med [jour] OR Nat Genet [jour] OR Lancet [jour] OR Lancet Oncol [jour] OR Proc Natl Acad Sci USA [jour] OR N Engl J Med [jour] OR Am J Hum Genet [jour] OR J Natl Cancer Inst [jour] OR Ann Oncol [jour] OR J Clin Oncol [jour] OR BMJ [jour] OR Sci Transl Med [jour] OR Cancer Discov [jour] OR JAMA Oncol [jour]) NOT review [ptyp]
